# Supplementary material for: anTraX, a software package for high-throughput video tracking of color-tagged insects
Source: eLife. 2020 Nov 19;9:e58145. doi: 10.7554/eLife.58145 (PMC7676868; doi:10.7554/eLife.58145)
Supplement: Figure 4—figure supplement 2—source data 2. [file elife-58145-fig4-figsupp2-data2.csv]

Duration	Count
5	36
10	24
15	9
20	3		88
25	4
30	1
35	2
40	1
45	3
50	1
55
60
65	1
70
75
80
85	1
90	1
95
100
105	1
