# Supplementary material for: anTraX, a software package for high-throughput video tracking of color-tagged insects
Source: eLife. 2020 Nov 19;9:e58145. doi: 10.7554/eLife.58145 (PMC7676868; doi:10.7554/eLife.58145)
Supplement: Figure 4—source data 1. — The data in this file were used to plot Figure 4A–B and Figure 4—figure supplement 1A,C, and are referenced in Table 2. [file elife-58145-fig4-data1.csv]

Dataset	assignment_rate_noprop	assignment_error_noprop	assignment_error_noprop_ci_low	assignment_error_noprop_ci_high	assignment_rate_final	assignment_error_final	assignment_error_final_ci_low	assignment_error_final_ci_high	frac_classified	error_classified	error_prop
J16	0.28	0.012	0.0044	0.026	0.93	0	0	0.0074	0.289024089	0.0076	0.0054
A36	0.24	0.014	0.0056	0.0286	0.81	0.006	0.0012	0.0174	0.219022385	0	0.0049
C12	0.82	0	0	0.0074	0.99	0	0	0.0074	0.815897755	0	0
C32	0.26	0.042	0.0262	0.0635	0.79	0.022	0.011	0.039	0.167724331	0.0256	0.0209
G6X8	0.57	0.122	0.0946	0.154	0.89	0.078	0.0561	0.1051	0.31477022	0.0723	0.0808
V25	0.07	0.058	0.0392	0.0822	0.48	0.012	0.0044	0.0259	0.034984815	0	0.013
T10	0.56	0.06	0.041	0.0845	0.96	0.018	0.0083	0.0339	0.553872266	0.0189	0.0169
D7	0.88	0	0	0.0074	0.98	0	0	0.0074	0.890332158	0	0
D16	0.89	0.004	0.0005	0.0144	0.997	0	0	0.0074	0.895416088	0	0
