# Supplementary material for: anTraX, a software package for high-throughput video tracking of color-tagged insects
Source: eLife. 2020 Nov 19;9:e58145. doi: 10.7554/eLife.58145 (PMC7676868; doi:10.7554/eLife.58145)
Supplement: Figure 4—source data 2. — The data in this file were used to plot Figure 4C–D and Figure 4—figure supplement 1B,D. [file elife-58145-fig4-data2.csv]

experiment	assignment_rate_noprop	assignment_error_noprop	assignment_rate_final	assignment_error_final	frac_classified	error_classified	error_prop
T3	0.2569	0.034	0.906	0.004	0.241773178	0	0.005
T4	0.2289	0.014	0.9188	0.008	0.205120653	0	0.0049
T5	0.2189	0.018	0.852	0	0.200279678	0	0
T6	0.2377	0.04	0.925	0.004	0.259796344	0.0099	0.0075
T7	0.2477	0.014	0.9088	0	0.225984821	0	0
T8	0.2227	0.018	0.9503	0.002	0.200685724	0	0.0026
T9	0.2712	0.026	0.944	0.004	0.211937451	0.0112	0.0024
T10	0.2399	0.046	0.898	0.012	0.190199524	0.0165	0.0106
T11	0.198	0.036	0.956	0.002	0.239081152	0	0.0024
T12	0.243	0.022	0.922	0.004	0.224627339	0	0.0048
